# Supplementary material for: Genome-Wide Association Studies of Maize Seedling Root Traits under Different Nitrogen Levels
Source: MDPI journal article supplement (doi:10.3390/plants11111417), 2022-05-26
Supplement: s1 [file s1]

SPAD

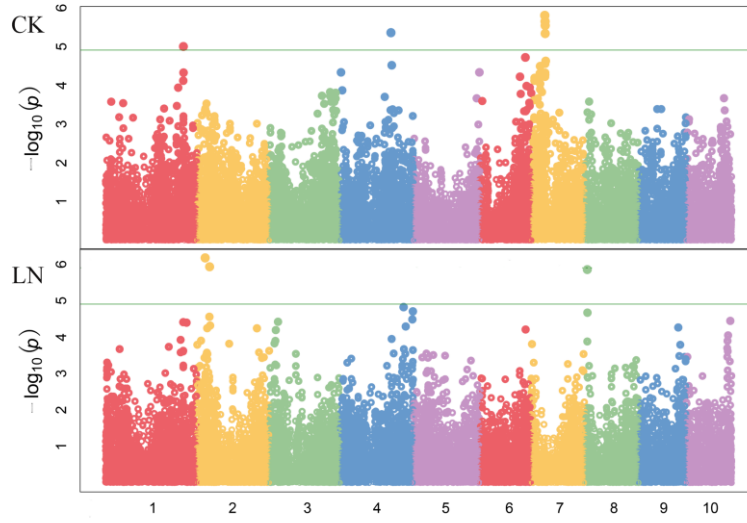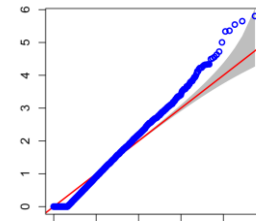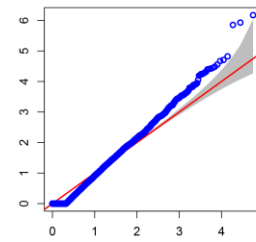

PH

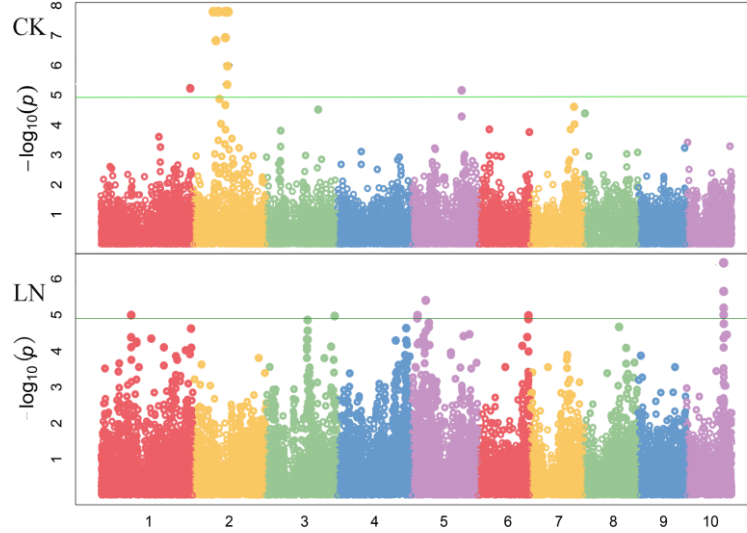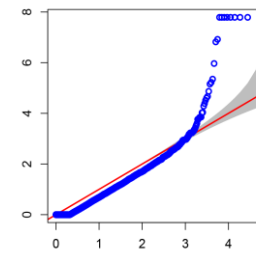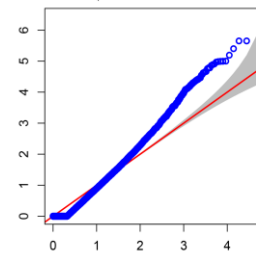

SDW

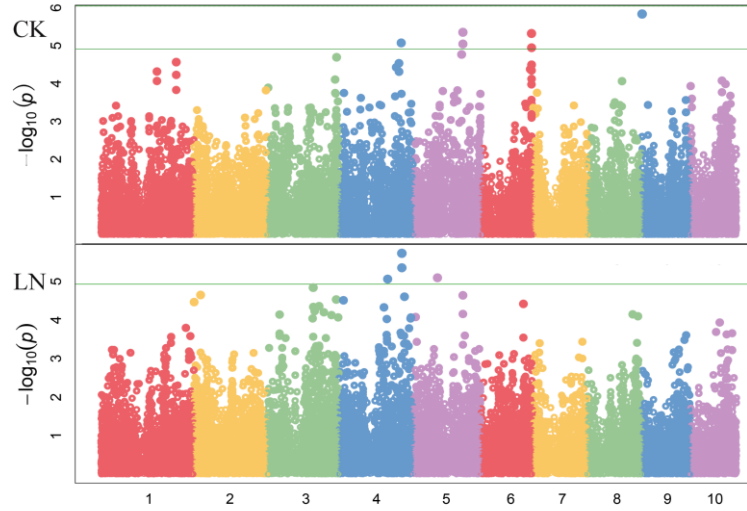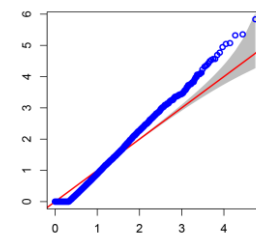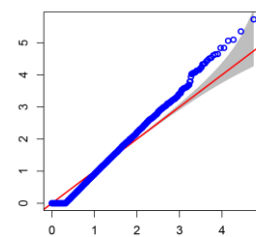

RDW

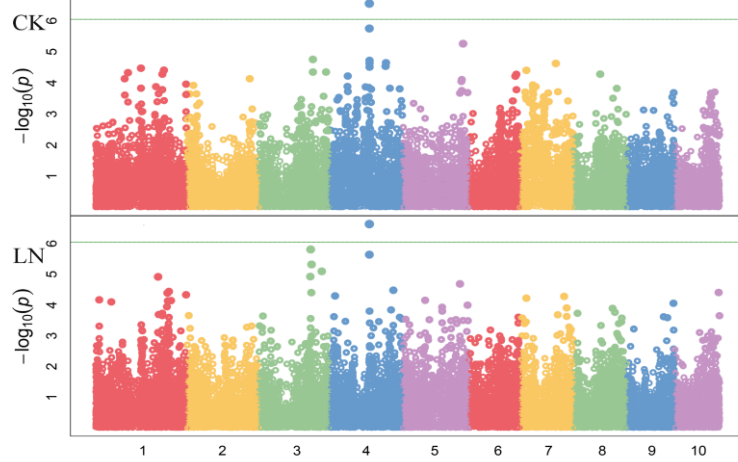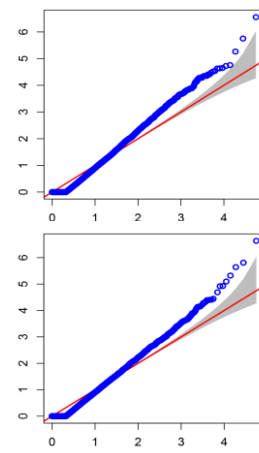

RSR

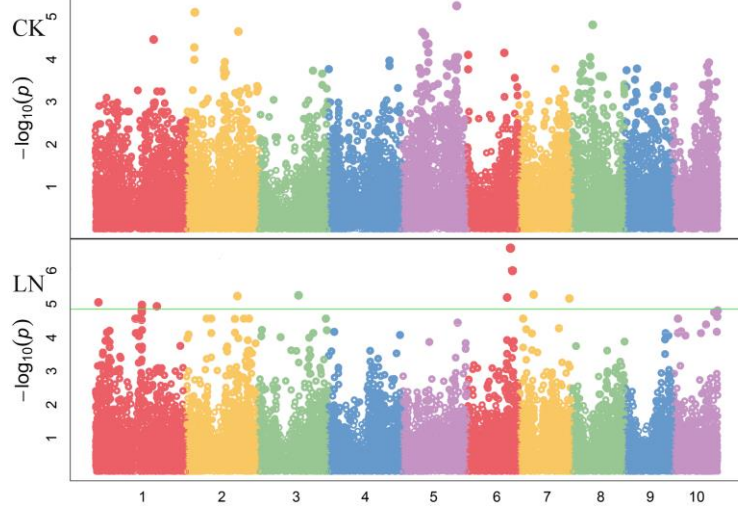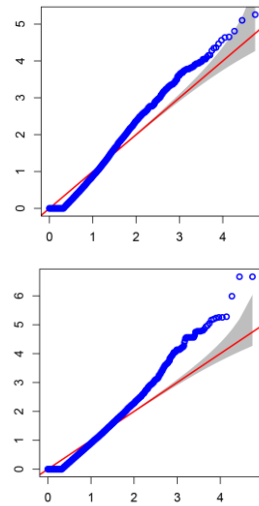

CRN

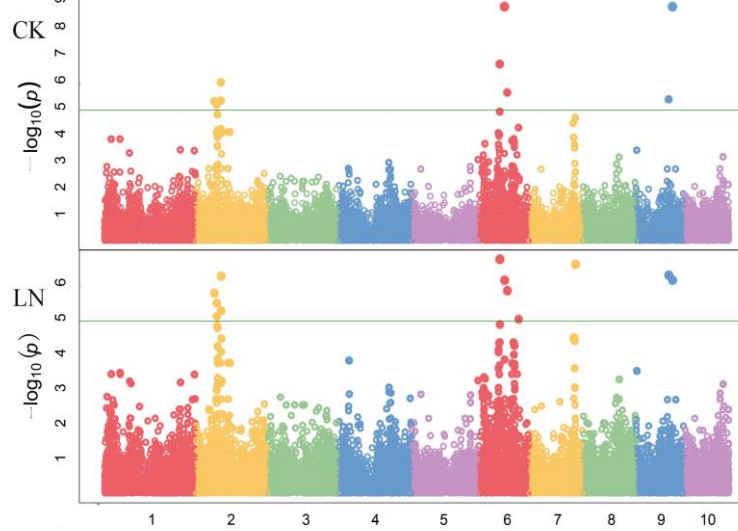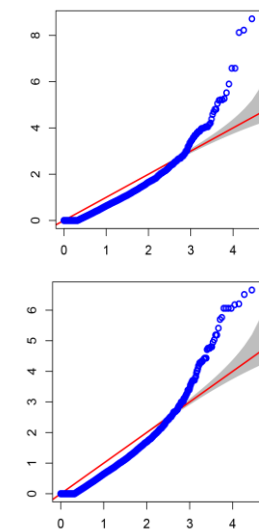

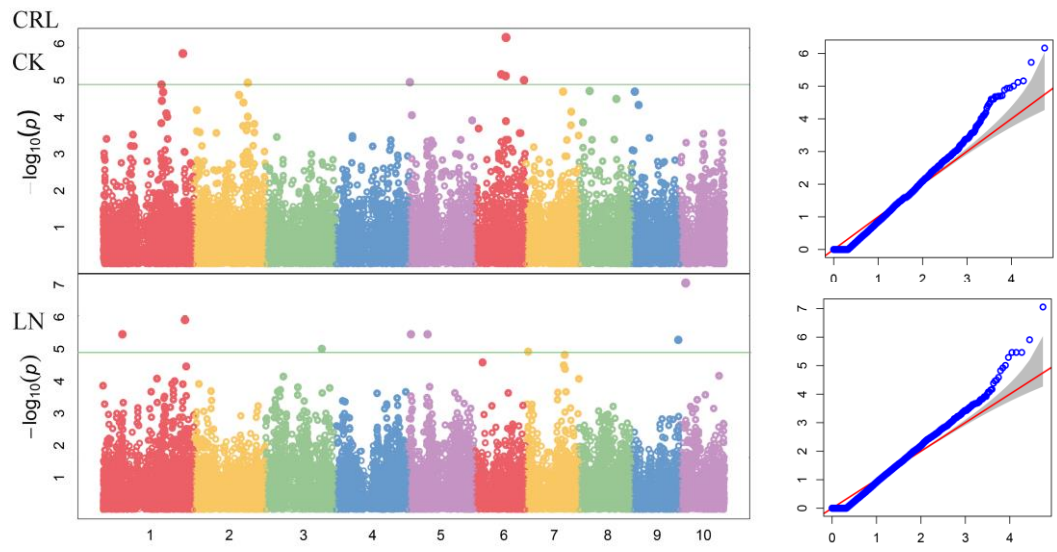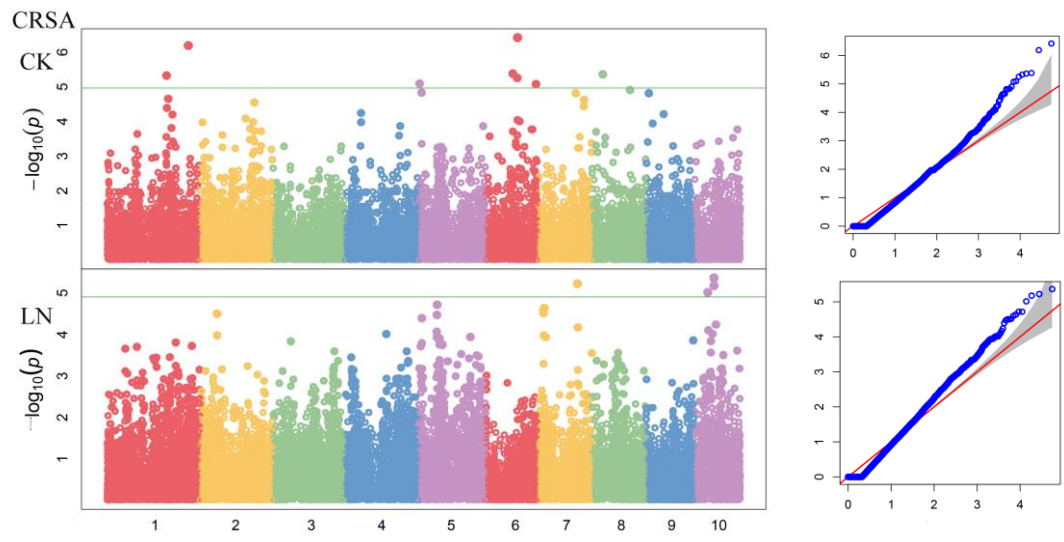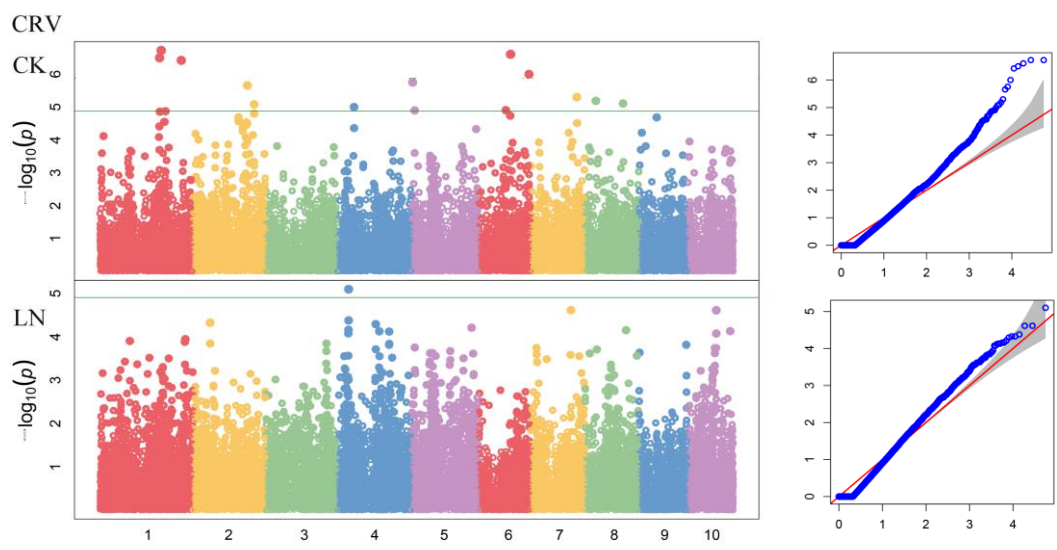

SRN

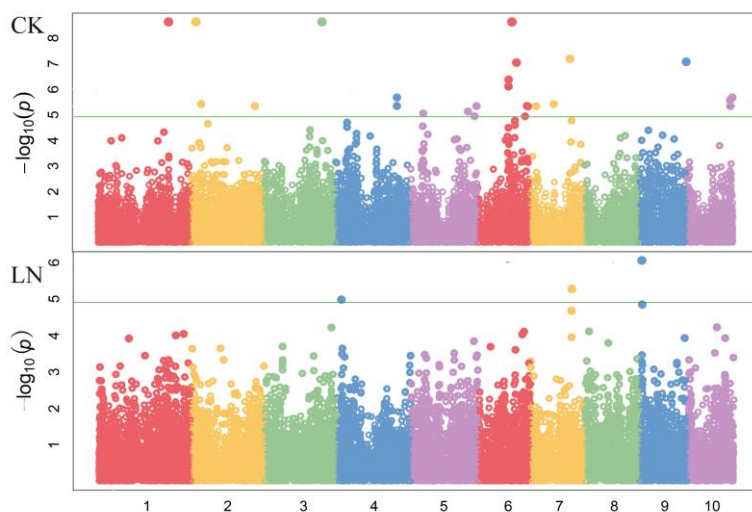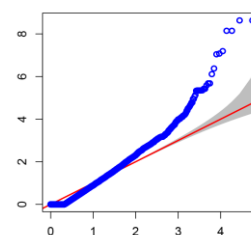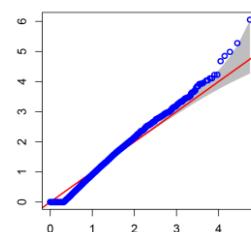

SRL

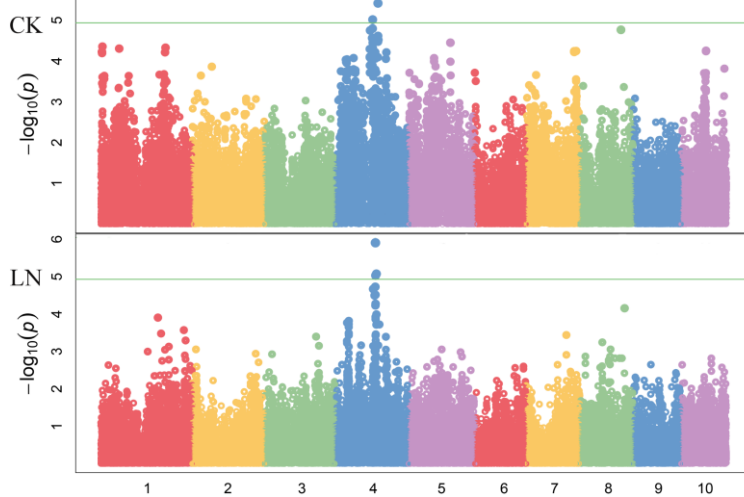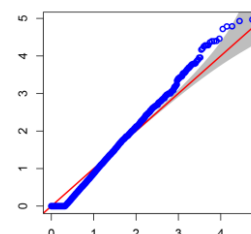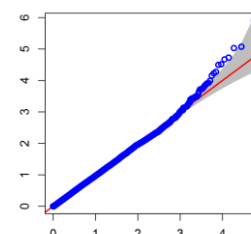

SRSA

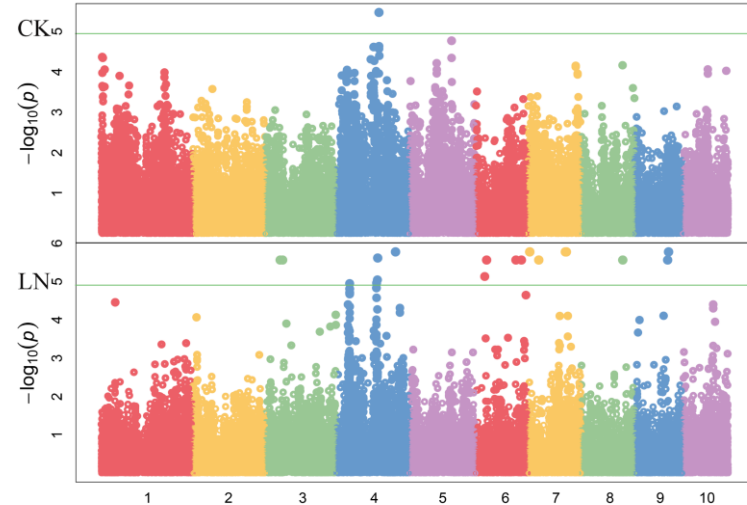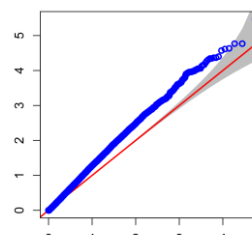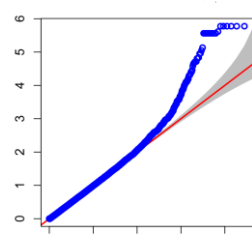



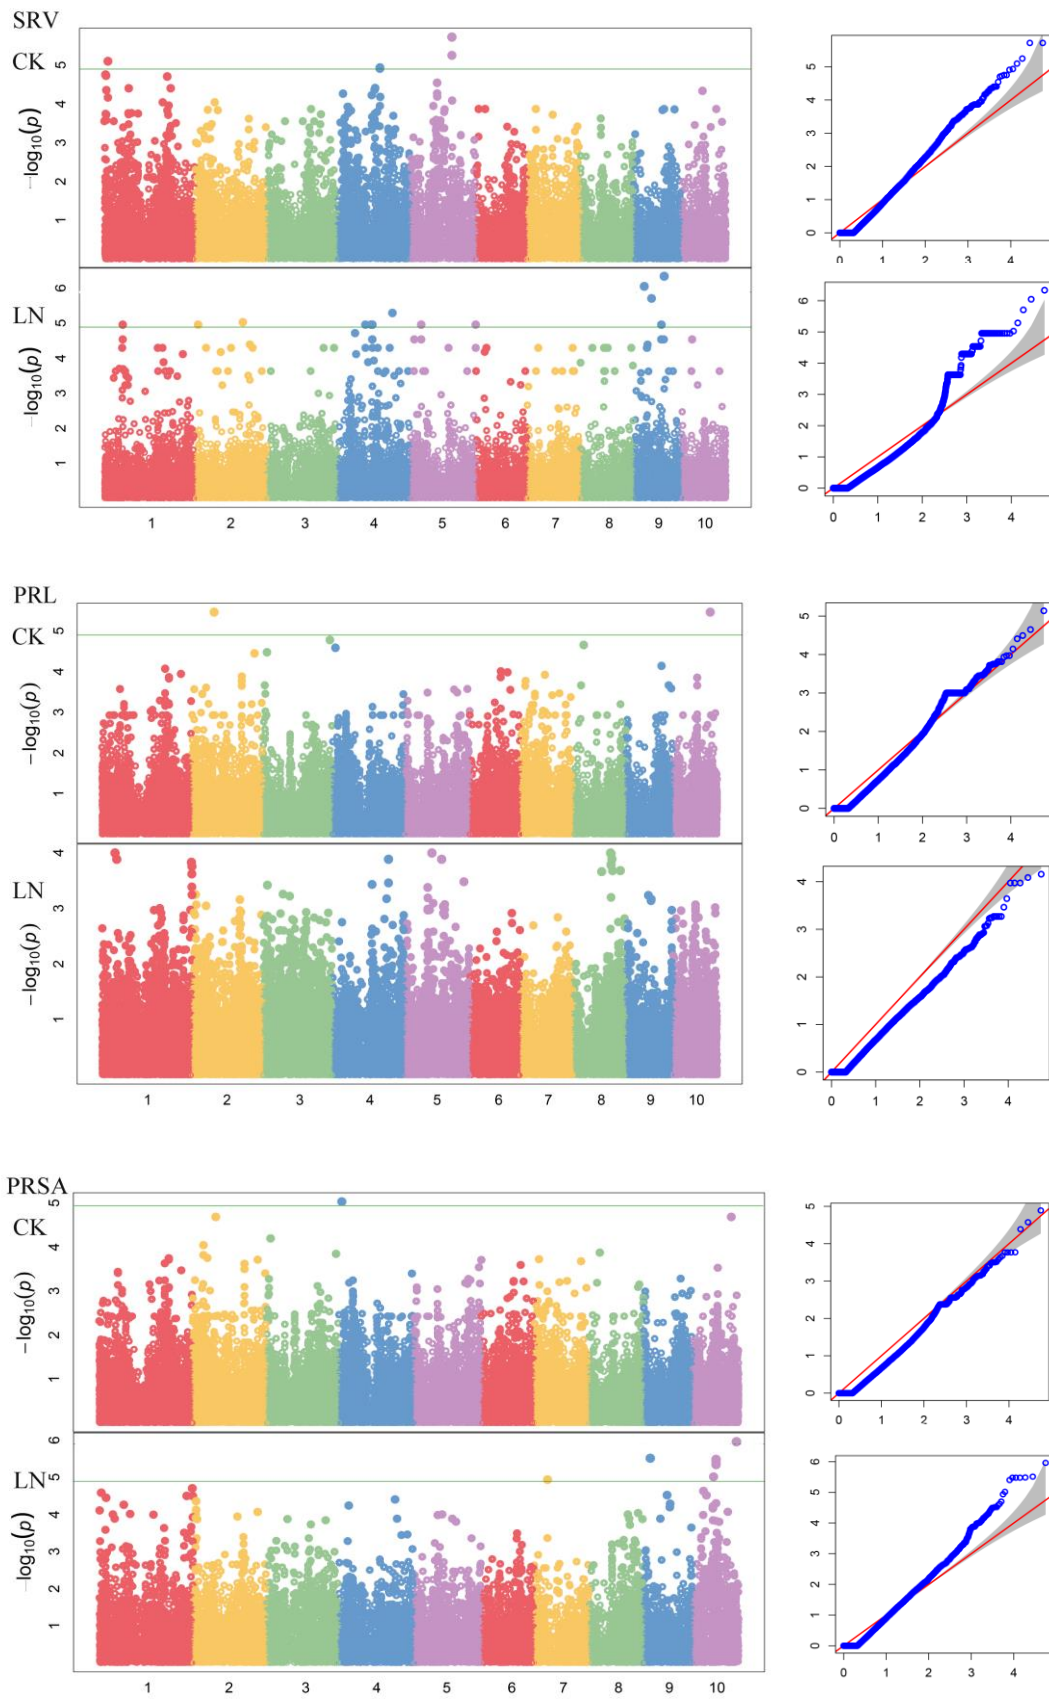

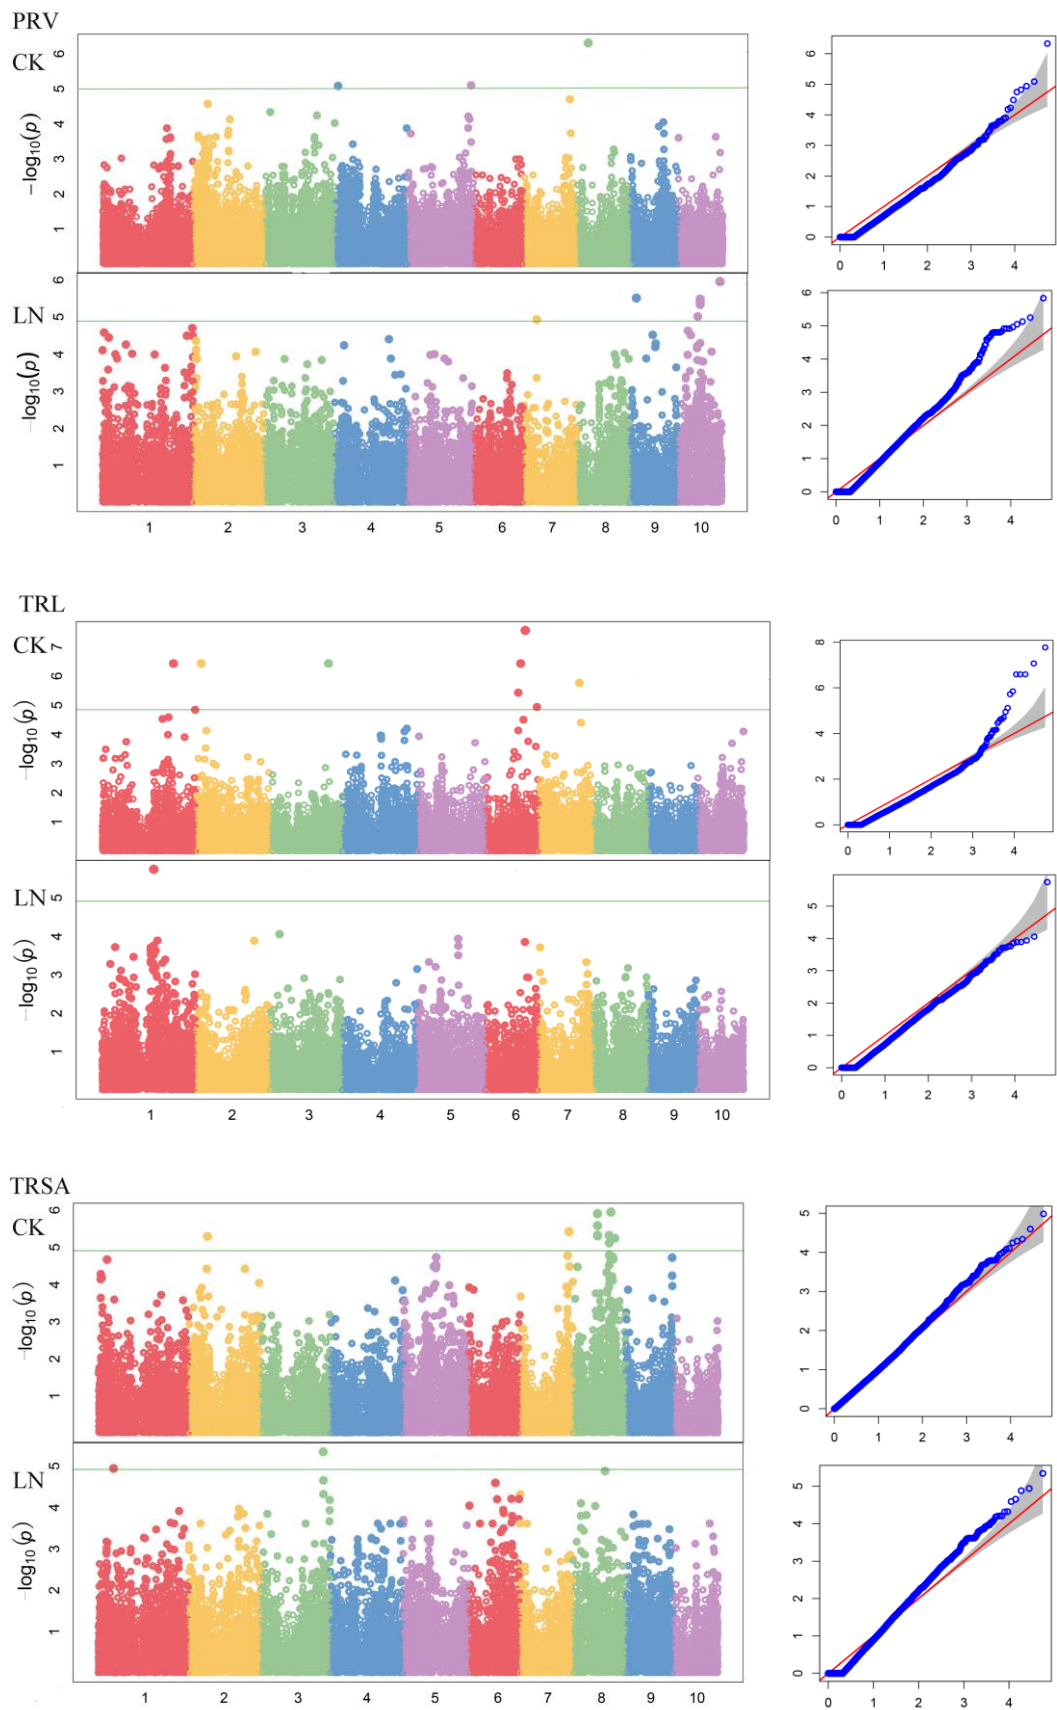

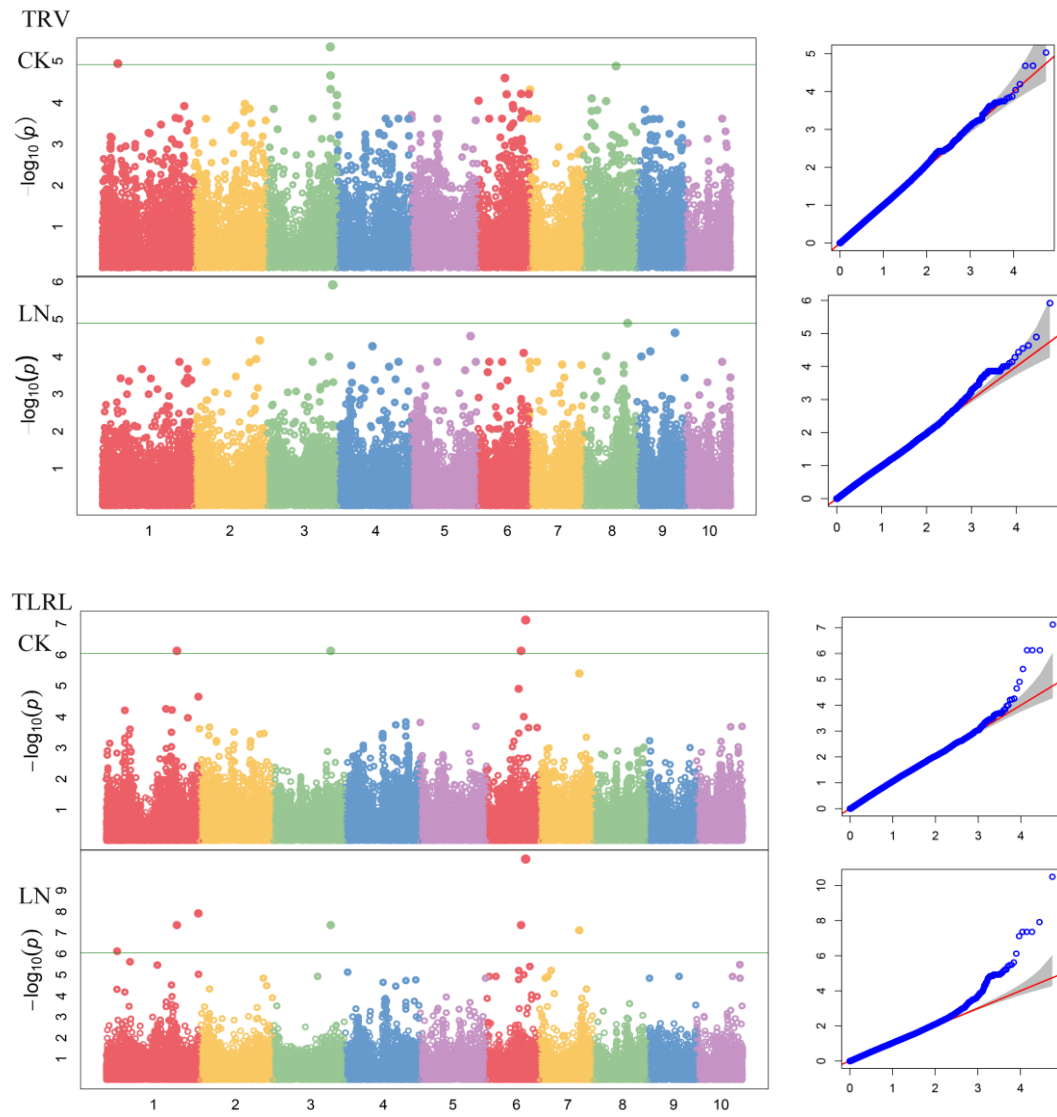

**Figure S1. Manhattan plot and QQ plot of 20 traits under CK and LN** The horizontal line in the figure indicates the significant  $-\log_{10}(P)$  value.
