# Supplementary material for: Genome-Wide Association Studies of Maize Seedling Root Traits under Different Nitrogen Levels
Source: Plants (Basel). 2022 May 26;11(11):1417. doi: 10.3390/plants11111417 (PMC9182862; doi:10.3390/plants11111417)
Supplement: Supplementary file 1 [file plants-11-01417-s001.zip]

Archive with 7 entries (7 files):
- Figure S1.pdf
- Figure S7.pdf
- Table S1.xlsx
- Table S2.xlsx
- Table S3.xlsx
- Table S5.xlsx
- Table S6.xlsx
