# Supplementary material for: Genome-Wide Association Studies of Maize Seedling Root Traits under Different Nitrogen Levels
Source: Plants (Basel). 2022 May 26;11(11):1417. doi: 10.3390/plants11111417 (PMC9182862; doi:10.3390/plants11111417)
Supplement: Supplementary file 1 [file plants-11-01417-s001.zip › Table S1.xlsx]

## Sheet: Sheet1
Table S1 – Phenotype statistics for the 20 traits.
	Traits	Mean	Standard Deviation	CV	Kurtosis	Skewness	Max	Min	h2
SPAD	CK	33.15	1.99	0.06	-0.05	-0.1	44.33	20.83	41.1623
	LN	29.96	1.64	0.06	-0.02	-0.16	38.37	16.63	49.5859
PH	CK	26.18	1.66	0.07	-0.22	-0.16	38.27	13	77.6883
	LN	20.44	0.96	0.05	-0.08	-0.39	29.15	7.75	35.41
SDW	CK	0.08	0.006	0.09	0.38	0.22	0.15	0.03	77.6231
	LN	0.06	0.005	0.09	0.64	0.46	0.12	0.02	47.0828
RDW	CK	0.03	0.003	0.12	-0.85	0.41	0.07	0.01	24.4825
	LN	0.04	0.004	0.11	-0.11	0.3	0.09	0.01	31.1783
RSR	CK	0.44	0.19	0.42	-0.31	0.39	0.95	0.11	70.0285
	LN	0.74	0.24	0.32	0.56	0.41	1.67	0.38	55.5666
TRL	CK	228.15	20.04	0.11	0.32	0.41	944.67	48.7	26.2466
	LN	263.24	13.53	0.06	0.61	0.45	955.65	41.53	28.2055
TRSA	CK	135.36	6.33	0.05	-0.3	0.27	305.21	13.08	28.7694
	LN	129.15	5.06	0.05	-0.28	0.28	321.26	15.55	38.343
TRV	CK	13.64	0.77	0.1	0.13	0.31	54.39	0.3	24.1426
	LN	15.83	0.97	0.11	-0.75	0.9	54.25	0.31	33.8094
CRN	CK	4.02	0.75	0.21	0.65	0.36	11.67	1	38.861
	LN	3.31	0.56	0.2	0.22	0.79	11.01	1	60.472
CRL	CK	9.92	0.198	0.02	0.31	0.64	53.38	0.24	24.4581
	LN	14.29	0.145	0.01	0.12	0.89	70.35	0.53	26.0543
CRSA	CK	1.74	0.058	0.03	0.56	0.75	10.46	0.01	24.6138
	LN	2.42	0.026	0.01	0.41	0.59	11.24	0.11	40.1141
CRV	CK	0.03	0.001	0.03	0.4	0.4	0.16	0.01	30.0799
	LN	0.05	0.001	0.02	0.34	0.83	44.85	0.01	40.4057
SRN	CK	4.11	1.09	0.35	0.29	0.33	14.67	1	34.6626
	LN	4.55	0.97	0.24	0.45	0.74	10.33	1	35.1507
SRL	CK	39.48	0.792	0.03	-0.31	0.65	109.83	4.52	65.5854
	LN	45.22	0.525	0.01	0.8	0.73	151.08	3.36	68.0478
SRSA	CK	4.57	0.034	0.01	-0.19	0.74	13.24	0.52	53.5729
	LN	6.23	0.041	0.01	3.36	0.9	21.78	0.23	56.9415
SRV	CK	0.19	0.001	0.01	0.85	0.64	0.72	0.04	30.1956
	LN	0.3	0.003	0.01	0.82	0.83	1.34	0.03	40.185
PRL	CK	21.29	0.12	0.01	0.41	0.91	68.79	5.03	62.8454
	LN	22.83	0.136	0.01	0.65	0.93	61.64	3.41	68.6693
PRSA	CK	2.96	0.027	0.02	0.64	0.51	8.58	0.61	63.8184
	LN	3.41	0.032	0.01	0.88	0.99	10.32	0.74	73.2249
PRV	CK	0.07	0.001	0.02	0.45	0.88	0.86	0.05	43.1875
	LN	0.09	0.001	0.02	0.64	0.1	0.3	0.01	50.9114
TLRL	CK	157.12	0.585	0.01	0.41	0.51	738.03	8.66	45.2326
	LN	182.87	0.636	0.01	0.47	0.89	795.03	29.84	49.1565
CV is Coefficient of variation; h^2 represent Heritability
