# Supplementary material for: Genome-Wide Association Studies of Maize Seedling Root Traits under Different Nitrogen Levels
Source: Plants (Basel). 2022 May 26;11(11):1417. doi: 10.3390/plants11111417 (PMC9182862; doi:10.3390/plants11111417)
Supplement: Supplementary file 1 [file plants-11-01417-s001.zip › Table S2.xlsx]

## Sheet: Sheet1
Table S2 – Correlation coefficients between the 20 traits
	SPAD	PH	SDW	RDW	RSR	TRL	TRSA	TRV	CRN	CRL	CRSA	CRV	SRN	SRL	SRSA	SRV	PRL	PRSA	PRV	TLRL
SPAD	1	.196**	.254**	.208**	-.169*	.144*	0.083173	0.0898142	-0.0544734	.155*	.137*	0.108816	-0.113182	.156**	0.0536125	.143*	.120*	.125*	0.0732692	0.0854731
PH	0.0891945	1	.530**	.238**	-.298**	.319**	.187**	-0.0550351	.166**	.179**	.218**	.221**	0.0800485	.153**	.123*	0.0578412	.202**	.221**	.220**	.210**
SDW	.193**	.179**	1	.395**	-.481**	.316**	.227**	0.111331	0.0586156	0.0527917	0.0742925	0.109591	.116*	.191**	.127*	0.10821	.189**	.198**	.212**	.244**
RDW	0.118649	.245**	.304**	1	.456**	.236**	.178*	.170*	0.0295913	0.136075	.142*	.194**	.262**	.246**	.195**	.194**	.195**	.178**	.172*	0.104907
RSR	-0.0788252	-.352**	-.393**	.378**	1	-0.144624	-0.122311	0.000741112	-0.121056	-0.0581062	-0.0751812	-0.0269311	0.107822	-0.071961	-0.00797328	-0.0131277	-0.0378679	-0.0796466	-0.112106	-.161*
TRL	.237**	.247**	0.134979	.309**	0.12651	1	.572**	0.106571	0.0511379	.201**	.234**	.309**	0.0670842	0.0970123	0.0439728	.233**	.195**	.193**	.188**	.738**
TRSA	0.122989	.196**	.151*	.381**	0.154023	.740**	1	.719**	-0.0369167	0.0532928	0.0587086	0.0593023	0.0967451	0.024304	-0.0582393	0.0215129	-0.00486799	-0.0331597	0.0116307	.452**
TRV	0.0815293	0.044197	0.109111	.260**	0.0957746	0.134051	.741**	1	-0.118861	-0.013255	-0.0576262	-0.122288	0.0888046	-0.00100999	-0.0431507	-0.0574045	-0.0889168	-0.11204	-0.0637975	0.0720554
CRN	-0.091889	.241**	-0.00481798	0.0658965	-0.0241816	0.000482089	0.023923	-0.0362881	1	-0.0184965	-0.0438347	-0.0252704	.143**	-0.0781687	-0.0670772	0.0104993	-.124*	-.115*	-0.103536	0.03512
CRL	0.0379418	.260**	0.0591193	0.0883014	-0.052906	.201**	-0.0297918	-.160*	0.0132855	1	.889**	.766**	0.0823209	.306**	.191**	.184**	.251**	.228**	.189**	0.113223
CRSA	0.069548	.245**	0.0754675	0.0758411	-0.059431	.185*	-0.0251533	-0.140564	0.0137391	.964**	1	.876**	0.0750179	.348**	.241**	.214**	.359**	.329**	.321**	.114*
CRV	0.0988618	.252**	0.101628	0.105601	-0.0687161	.223**	0.000523856	-0.109812	0.0199322	.941**	.954**	1	0.0609634	.360**	.274**	.285**	.401**	.406**	.360**	.166**
SRN	-0.0553536	.158**	0.0531829	.160*	0.147063	-0.0371199	-0.0178517	-0.01457	0.027163	0.0980876	0.104385	0.0927566	1	-0.0240997	-0.00800334	0.0118146	-0.0781992	-0.0681911	-0.0260061	0.00355409
SRL	0.0767245	0.0996816	.169**	.182*	0.00900027	0.115158	-0.0449976	-0.0660239	-0.0926378	.477**	.461**	.471**	.115*	1	.896**	.622**	.619**	.579**	.531**	.156**
SRSA	0.0921942	0.0910388	.196**	.168*	-0.0244176	0.126308	0.000245654	-0.0107469	-.108*	.495**	.478**	.503**	0.0728349	.958**	1	.722**	.566**	.553**	.510**	.131*
SRV	.172*	0.0802448	.216**	.177*	-0.106524	.308**	0.0373841	-0.0759583	-.178**	.470**	.469**	.503**	0.0775603	.905**	.971**	1	.242**	.274**	.225**	0.109208
PRL	0.0444889	0.0831956	0.107566	0.080581	-0.0513946	0.0425031	-0.0592355	-0.0457719	-0.0534155	.514**	.519**	.532**	-0.0398014	.683**	.694**	.566**	1	.943**	.884**	.236**
PRSA	0.0331833	0.0987317	0.0948493	0.0729705	-0.0687938	0.0522329	-0.0813487	-0.083652	-0.0351171	.508**	.515**	.526**	-0.0315621	.684**	.694**	.580**	.979**	1	.937**	.205**
PRV	0.013076	.147**	0.0983249	0.119784	-0.0776501	0.132261	-0.0339057	-0.110748	0.00815041	.424**	.435**	.441**	0.0359691	.612**	.625**	.519**	.837**	.868**	1	.209**
TLRL	0.069758	.118*	.116*	.227**	-0.046061	.928**	.650**	0.119967	0.00631577	0.0784997	0.0744238	0.0953047	-0.0232406	.187**	.185**	.130*	.168**	.181**	.215**	1
Lower left, coefficient value under CK treatment; Upper right, coefficient value under LN treatment; *, P＜0.05; **, P＜0.01.
