# Supplementary material for: Genome-Wide Association Studies of Maize Seedling Root Traits under Different Nitrogen Levels
Source: Plants (Basel). 2022 May 26;11(11):1417. doi: 10.3390/plants11111417 (PMC9182862; doi:10.3390/plants11111417)
Supplement: Supplementary file 1 [file plants-11-01417-s001.zip › Table S3.xlsx]

## Sheet: Sheet1
Table S3 – SNPs and candidate genes significantly associated with seedling traits identified by GWAS.
Traits	Env	SNP	Chr	Pos-V4(bp)	Allele	P-value	Gene	Function
SPAD	CK	AX-86255599	10	4064242	A/G	7.95238e-07	Zm00001d023360	CBL-interacting protein kinase 14
SPAD	CK	AX-86327706	9	151246724	A/C	7.95238e-07	Zm00001d048161	Cysteine-rich and transmembrane domain-containing protein WIH2
SPAD	CK	AX-86285903	1	197543121	T/C	9.60314e-07	Zm00001d031656	Serine/threonine-protein phosphatase 7
SPAD	CK	AX-116875403	7	5523181	A/G	2.67681e-06	Zm00001d018800	Tortifolia1-like protein 2/ARM repeat superfamily protein
SPAD	CK	AX-86265651	1	178689818	A/C	2.94578e-06	Zm00001d031127	2-aminoethanethiol dioxygenase-like
SPAD	CK	AX-86285738	1	169447041	T/C	3.29741e-06	Zm00001d030963	Chaperonin-like RbcX protein
SPAD	CK	AX-86282807	2	174978322	T/C	3.83322e-06	Zm00001d005459	Putative cytidine deaminase
PH	CK	AX-86242415	2	81662038	A/G	1.62e-08	Zm00001d004089	Pathogenesis-related protein PR-1 type
PH	CK	AX-86242634	2	113186337	A/G	1.62e-08	Zm00001d004459	Peroxidase
PH	CK	AX-86242315	2	65513004	A/G	1.62e-08	Zm00001d003889	Trihelix transcription factor ASR3
PH	CK	AX-86242672	2	83189156	A/C	1.62e-08	Zm00001d004109	Protein arginine N-methyltransferase 1.5
PH	CK	AX-86242568	2	104729934	A/C	1.2e-07	Zm00001d004340	Transmembrane amino acid transporter family protein
PH	CK	AX-86266952	2	73989220	T/C	1.51e-07	Zm00001d003990	Purple acid phosphatase 3
PH	CK	AX-116872874	2	111583492	A/G	1.08e-06	Zm00001d004434	Alpha-galactosidase
PH	CK	AX-86308370	1	291561347	T/C	5.99e-06	Zm00001d034383	Glutamate carboxypeptidase/Putative membrane localized peptidase
PH	CK	AX-86280639	5	164124311	T/C	6.97e-06	Zm00001d016478	Thioredoxin superfamily protein
SDW	CK	AX-86247548	4	207978061	A/C	7.06797e-08	Zm00001d052991	60S ribosomal protein L11
SDW	CK	AX-86247609	4	214504400	A/C	7.06804e-08	Zm00001d053118	Thioredoxin reductase
SDW	CK	AX-86318969	7	164952176	T/C	1.48275e-07	Zm00001d021866	COMPASS-like H3K4 histone methylase component WDR5B
SDW	CK	AX-86320522	8	166385966	T/C	1.54099e-06	Zm00001d012005	Putative histidine kinase family protein
SDW	CK	AX-86293141	5	161875667	T/C	3.22238e-06	Zm00001d016419	Glutamate dehydrogenase 2
SDW	CK	AX-86293139	5	161631520	T/C	4.32385e-06	Zm00001d016414	UDP-glycosyltransferase 73D1
RDW	CK	AX-86291085	4	132201833	T/C	2.79731e-07	Zm00001d050929	DNA mismatch repair protein PMS1
RDW	CK	AX-86249568	5	199647442	A/G	5.45472e-06	Zm00001d052745	1-deoxy-D-xylulose 5-phosphate reductoisomerase chloroplastic
TRL	CK	AX-86240640	1	166711740	A/C	1.81521e-06	Zm00001d030900	Pyridoxal phosphate (PLP)-dependent transferase superfamily protein
TRSA	CK	AX-86257439	8	142294562	T/C	1.03327e-05	THI1-1	Thiamine thiazole synthase, chloroplastic
TRV	CK	AX-116874883	1	172856565	A/G	2.04399e-07	Zm00001d031002	Tetratricopeptide repeat (TPR)-like superfamily protein
TRV	CK	AX-95685800	6	1281263	T/C	4.13559e-07	Zm00001d034990	Polygalacturonase
CRN	CK	AX-116872539	9	120249620	T/G	2.49456e-07	Zm00001d047156	SKU5 similar 13
CRN	CK	AX-86257382	6	88565391	T/C	2.49456e-07	Zm00001d036439	Arogenate dehydrogenase isoform 2
CRN	CK	AX-86258361	7	145969952	T/C	7.7663e-07	Zm00001d021203	ATPase ASNA1 homolog
CRN	CK	AX-86281500	7	152824375	T/C	1.12713e-06	Zm00001d021462	Enoyl-CoA hydratase 2, peroxisomal
CRN	CK	AX-86282993	7	147711148	T/C	1.20957e-06	Zm00001d021280	Endoglucanase
CRN	CK	AX-86301698	7	147588322	T/C	1.20957e-06	Zm00001d021278	Orphans transcription factor
CRN	CK	AX-116872618	9	107796957	T/G	3.3709e-06	Zm00001d046831	Protein phosphatase type-2C
CRN	CK	AX-86262524	7	150177921	T/C	3.6065e-06	Zm00001d021368	Tetratricopeptide repeat (TPR)-like superfamily protein
CRN	CK	AX-86309115	2	83457952	T/C	4.85346e-06	Zm00001d004115	Importin subunit alpha-1b
CRN	CK	AX-86273633	6	120997582	T/C	5.14114e-06	Zm00001d037321	Autophagy-related protein 2
CRN	CK	AX-86261987	7	151082116	T/C	6.41403e-06	Zm00001d021400	Octicosapeptide/Phox/Bem1p (PB1) domain-containing protein / tetratricopeptide repeat (TPR)-containing protein
CRN	CK	AX-86284234	7	150087743	T/C	6.41403e-06	Zm00001d021367	Glutamate-ammonia ligase
CRN	CK	AX-86259613	6	117599465	T/C	9.41573e-06	Zm00001d037241	Pectin acetylesterase
CRN	CK	AX-86260338	6	118073693	T/C	9.41573e-06	Zm00001d037249	Protein ALTERED XYLOGLUCAN 4
CRL	CK	AX-90573568	6	104069296	T/C	6.83653e-07	Zm00001d036854	Calcium-dependent lipid-binding (CaLB domain) family protein
CRL	CK	AX-86250396	6	88564187	A/G	6.90481e-06	Zm00001d036439	Arogenate dehydrogenase
CRL	CK	AX-86250542	6	102834381	T/C	7.64329e-06	Zm00001d036824	Exopolygalacturonase-like
CRSA	CK	AX-86256005	10	36801472	A/G	3.46949e-11	Zm00001d024011	Putative lysine-specific demethylase ELF6, partial
CRSA	CK	AX-86273294	6	71497777	A/C	3.46949e-11	Zm00001d036088	AT-hook motif nuclear-localized protein 16
CRSA	CK	AX-90573568	6	104069296	T/C	1.62809e-10	Zm00001d036854	Calcium-dependent lipid-binding (CaLB domain) family protein
CRV	CK	AX-86240931	1	199407707	A/G	1.89694e-07	Zm00001d031719	Retrovirus-related Pol polyprotein LINE-1
CRV	CK	AX-90573568	6	104069296	T/C	2.48319e-07	Zm00001d036853	Serine incorporator 3
CRV	CK	AX-86261651	1	193877737	A/G	3.17705e-07	Zm00001d031544	LOB domain-containing protein 23
CRV	CK	AX-86284106	1	264533418	A/C	3.80311e-07	Zm00001d033496	Nicotianamine synthase 3
CRV	CK	AX-86251062	6	163665243	A/G	1.00328e-06	Zm00001d038737	Serine acetyltransferase 3
CRV	CK	AX-86329131	5	3727431	T/G	1.76805e-06	Zm00001d013046	Lipid phosphate phosphatase delta
SRN	CK	AX-86291150	4	141271163	A/G	3.94188e-06	Zm00001d051083	Probable LRR receptor-like serine/threonine-protein kinase At3g47570
SRN	CK	AX-86313284	4	123668118	T/G	5.02987e-06	Zm00001d050798	E3 ubiquitin-protein ligase EL5
SRN	CK	AX-86301408	4	141093854	A/G	5.18614e-06	Zm00001d051080	Adenine phosphoribosyltransferase 2
SRL	CK	AX-86291150	4	141271163	T/G	1.4e-06	Zm00001d051081	Nucleotide / sugar transporter family proteins
SRL	CK	AX-116872133	4	115498212	T/G	1.76963e-05	Zm00001d050689	U-box domain containing protein 27
SRSA	CK	AX-86313284	4	123668118	T/G	5.03e-06	Zm00001d050798	E3 ubiquitin protein ligase el5
SRSA	CK	AX-86301408	4	141093854	A/G	5.19e-06	Zm00001d051080	Adenine phosphoribosyltransferase 2
SRSA	CK	AX-86291150	4	141000000	T/G	3.94e-06	Zm00001d051083	A possible LRR receptor like serine / threonine protein kinase at3g47570
SRSA	CK	AX-86327158	1	11989022	T/C	7.99e-06	Zm00001d027714	Putative rRNA large subunit pseudouridine synthase SVR1, chloroplast
SRV	CK	AX-86327158	1	11989022	T/C	7.98775e-06	Zm00001d027714	Putative rRNA large subunit pseudouridine synthase SVR1, chloroplastic
PRL	CK	AX-86299331	10	125539070	T/C	3.47736e-06
PRL	CK	AX-86309072	2	74078794	T/G	3.47736e-06	Zm00001d003990	Purple acid phosphatase 3
PRL	CK	AX-86305805	3	223839842	T/C	1.67836e-05	Zm00001d044278	DNA repair protein RAD51
PRL	CK	AX-116872925	8	35146103	A/C	2.22729e-05	Zm00001d009078	Putative protein phosphatase 2C 33
PRL	CK	AX-116872105	4	10394930	T/C	2.61249e-05	Zm00001d048944	GTP-binding protein hflX
PRL	CK	AX-86243833	3	13536230	A/C	3.36648e-05	Zm00001d039741	Enoyl-CoA delta isomerase 2 peroxisomal
PRL	CK	AX-86267858	2	208852298	A/G	3.58134e-05	Zm00001d006457	Hydrolase/ protein serine/threonine phosphatase
PRL	CK	AX-86321548	9	119429510	T/C	7.27198e-05	Zm00001d047130	Translocase of chloroplast 120, chloroplastic
PRL	CK	AX-86300327	1	211670702	A/G	8.55085e-05
PRL	CK	AX-86282834	6	103867686	T/C	9.87327e-05	Zm00001d036853	Serine incorporator 3
PRSA	CK	AX-116872105	4	10394930	T/C	9.32673e-06	Zm00001d048944	GTP-binding protein hflX
PRSA	CK	AX-86299331	10	125539070	T/C	2.07537e-05
PRSA	CK	AX-86309072	2	74078794	T/G	2.07537e-05	Zm00001d003990	Purple acid phosphatase 3
PRSA	CK	AX-86243833	3	13536230	A/C	6.37809e-05	Zm00001d039741	Enoyl-CoA delta isomerase 2 peroxisomal
PRSA	CK	AX-86266675	2	34574575	A/C	9.09204e-05
PRV	CK	AX-116872925	8	35146103	A/C	4.96198e-07	Zm00001d009078	Putative protein phosphatase 2C 33
PRV	CK	AX-86329047	5	209872363	C/G	7.98378e-06	Zm00001d017867	Aspartyl protease AED1
PRV	CK	AX-116872105	4	10394930	T/C	8.31273e-06	Zm00001d048944	GTP-binding protein hflX
PRV	CK	AX-86295717	7	150871144	T/C	1.98062e-05	Zm00001d021398	Calcium/calmodulin-dependent serine/threonine-protein kinase 1
PRV	CK	AX-116874532	2	47288831	A/G	2.68677e-05	Zm00001d003538
PRV	CK	AX-86310449	3	17441429	T/G	4.60361e-05	Zm00001d039875	Ubiquitin recognition factor in ER-associated degradation protein 1
PRV	CK	AX-116872086	3	172201953	A/C	5.7703e-05	Zm00001d042563	Mitogen-activated protein kinase kinase 9
PRV	CK	AX-86299771	5	200649357	A/C	6.1288e-05	Zm00001d017584	lysophospholipid acyltransferase 1
PRV	CK	AX-86293494	5	204821767	T/C	7.27216e-05	Zm00001d017707	P-loop containing nucleoside triphosphate hydrolase superfamily protein
PRV	CK	AX-116872553	9	108353118	A/C	8.91876e-05	Zm00001d046848	1-aminocyclopropane-1-carboxylate oxidase 1
PRV	CK	AX-86312247	3	230992107	C/G	9.44257e-05	Zm00001d044532	DUF724 domain-containing protein 6
TLRL	CK	AX-86273682	6	126347178	T/C	7.63172e-08	Zm00001d037468	Phosphate transporter PHO1-3
TLRL	CK	AX-116873220	1	229068153	A/G	7.49538e-07	Zm00001d032517	Copper transport protein family
TLRL	CK	AX-86250601	6	111675340	A/G	7.49538e-07	Zm00001d037079	Glutathione peroxidase
TLRL	CK	AX-86269378	3	187535554	T/C	7.49538e-07	Zm00001d043056	Serine/threonine-protein kinase NAK
TLRL	CK	AX-86295573	7	130644017	T/C	3.99914e-06	Zm00001d020736	Gibberellin receptor GID1L2
TLRL	CK	AX-86282834	6	103867686	T/C	1.24593e-05	Zm00001d036853	Serine incorporator 3
TLRL	CK	AX-86266372	1	298408800	A/G	2.24353e-05	Zm00001d034629	Indeterminate spikelet 1
TLRL	CK	AX-86261651	1	193877737	A/G	5.53223e-05	Zm00001d031550	TD and POZ domain-containing protein 3
TLRL	CK	AX-86282000	1	213098622	A/C	6.02301e-05	Zm00001d032107	4-coumarate--CoA ligase-like 1
TLRL	CK	AX-86258300	1	61018740	A/G	6.18637e-05	Zm00001d029170	Superoxide dismutase 4
TLRL	CK	AX-86317282	6	120453228	T/C	9.85045e-05	Zm00001d037313
SPAD	LN	AX-86282490	3	8119133	A/G	6.51e-06	Zm00001d039575	1-aminocyclopropane-1-carboxylate oxidase
SPAD	LN	AX-86291262	4	154626608	T/C	8.12e-06	Zm00001d051328	Putative WRKY DNA-binding domain superfamily protein
PH	LN	AX-86269490	3	204282345	T/C	6.14425e-06	Zm00001d043579	Anther-specific proline-rich protein APG
PH	LN	AX-86314045	4	203817172	T/C	8.49493e-06	Zm00001d052892	Polygalacturonase inhibitor 1
SDW	LN	AX-86313608	4	157920851	T/C	8.68e-06	Zm00001d051421	Protein S-acyltransferase 10
RDW	LN	AX-91344411	3	170901791	T/C	1.55442e-06	Zm00001d042526	Rhodanese/Cell cycle control phosphatase superfamily protein
RDW	LN	AX-86245197	3	173796843	A/C	4.78518e-06	Zm00001d042615	Ubinuclein-1
RDW	LN	AX-86304577	3	207485524	T/C	8.00362e-06	Zm00001d043686	Acid phosphatase
RDW	LN	AX-86304578	3	207485524	T/C	8.00362e-06	Zm00001d043692	Cytokinin riboside 5’-monophosphate phosphoribohydrolase
RSR	LN	AX-86250910	6	142486871	T/G	2.17833e-07	Zm00001d037932	Putative E3 ubiquitin-protein ligase LIN-1
RSR	LN	AX-86250914	6	142569088	T/G	2.17833e-07	Zm00001d037931	Biotin synthase
RSR	LN	AX-86250914	6	142569088	T/G	2.17833e-07	Zm00001d037934	UDP-glucuronic acid decarboxylase 2
RSR	LN	AX-86294585	6	148970569	T/C	1.02777e-06	Zm00001d038131	Kinesin-like protein
RSR	LN	AX-116874502	3	133453718	A/G	5.56013e-06	Zm00001d041690	Adenosine 5'-phosphosulfate reductase-like 7
RSR	LN	AX-86303869	2	168700555	T/C	5.84368e-06	Zm00001d005302	CAX-interacting protein 4
RSR	LN	AX-86294467	6	131461332	T/C	6.41784e-06	Zm00001d037605	C2C2-GATA transcription factor
RSR	LN	AX-86252420	7	168107784	T/G	6.90469e-06	Zm00001d022017	Indole-3-acetic acid-amido synthetase GH3.8
RSR	LN	AX-86239224	1	10824302	A/G	8.93375e-06	Zm00001d027676	Calmodulin-binding receptor-like cytoplasmic kinase 1
TRL	LN	AX-86318731	7	135811716	T/C	3.53179e-07	Zm00001d020897	Subtilisin-like protease SBT3.9
TRL	LN	AX-86224900	3	1686779	T/G	5.08291e-07	Zm00001d039318	Probable membrane-associated kinase regulator 2
TRL	LN	AX-86243496	2	207040427	A/C	2.10805e-06	Zm00001d006410	COP9 signalosome complex subunit 7
TRL	LN	AX-91355562	7	20689573	T/C	2.10805e-06	Zm00001d019184	KHG/KDPG aldolase
TRL	LN	AX-116872214	5	214730290	A/G	2.10818e-06	Zm00001d018122	E3 ubiquitin-protein ligase ATL31
TRL	LN	AX-86256949	10	140994736	T/C	2.10818e-06	Zm00001d026211	UV-B-induced protein chloroplastic
TRL	LN	AX-86295573	7	130644017	T/C	5.62253e-06	Zm00001d020736	Gibberellin receptor GID1L2
TRSA	LN	AX-116872902	7	170025644	C/G	4.98236e-07	Zm00001d022092	Sulfotransferase
TRSA	LN	AX-86262411	3	216482209	T/C	3.32198e-06	Zm00001d044015	2C-type protein phosphatase protein
TRV	LN	AX-86262411	3	216482209	T/C	1.21084e-06	Zm00001d044008	Myosin heavy chain-like
CRN	LN	AX-95657882	2	72860003	T/C	7.54697e-06	Zm00001d003968	Fructose-bisphosphate aldolase 3, chloroplastic
CRL	LN	AX-86286544	1	271970014	T/G	1.23553e-06	Zm00001d033711	Chemocyanin
CRL	LN	AX-116872164	5	7595008	T/C	3.45334e-06	Zm00001d013268	Lysosomal beta glucosidase-like
CRL	LN	AX-86284950	1	65046932	T/C	3.45334e-06	Zm00001d029290	Cytochrome P450 709B2
CRL	LN	AX-86305518	5	62595345	A/G	3.45334e-06	Zm00001d014772	NADH ubiquinone oxidoreductase B22-like subunit
CRL	LN	AX-116872414	9	152806140	A/G	5.15403e-06	Zm00001d048227	Homeodomain-leucine zipper transcription factor TaHDZipI-1
CRL	LN	AX-90539795	3	186206047	T/C	9.76498e-06	Zm00001d043000	Gibberellin receptor GID1
CRSA	LN	AX-86318668	7	129359485	A/G	6.00249e-06	Zm00001d020704	Heat stress transcription factor B-4c
CRSA	LN	AX-86322338	10	63621970	T/C	6.6831e-06	Zm00001d024312	Peroxisomal (S)-2-hydroxy-acid oxidase GLO1
CRV	LN	AX-86269910	4	37297639	A/C	7.96076e-06	Zm00001d049605	Protein CHROMATIN REMODELING 35
CRV	LN	AX-116874653	7	130947753	A/G	2.42584e-05	Zm00001d020742	Putative carboxylesterase 2
CRV	LN	AX-86256466	10	93892740	A/G	2.4359e-05	Zm00001d024903	Heat shock protein HSP82
SRN	LN	AX-86256948	10	140353124	A/G	4.0686e-07	Zm00001d026166	C2H2-type zinc finger family protein
SRL	LN	AX-86313386	4	132763686	T/C	9.34261e-08	Zm00001d050938	Pentatricopeptide repeat-containing protein At4g14850
SRL	LN	AX-86312598	4	39600457	T/C	2.86121e-06	Zm00001d049671	Calmodulin-binding transcription activator 2
SRL	LN	AX-86246699	4	125494031	A/G	3.51481e-06	Zm00001d050834	Homeobox-leucine zipper protein HOX7
SRL	LN	AX-116872403	9	110251271	A/G	4.41e-08	Zm00001d046912	Cyclin-dependent kinase B2-1
SRSA	LN	AX-86274763	7	127268490	A/C	4.41e-08	Zm00001d020665	Putative non-intrinsic ABC protein 5, partial
SRSA	LN	AX-86250955	6	149088675	A/G	4.41e-08	Zm00001d038135	Probable serine/threonine-protein kinase PBL7
SRSA	LN	AX-90555286	8	135716808	A/G	4.41e-08	Zm00001d010976	Beta3-glucuronyltransferase
SRV	LN	AX-86321387	9	100992477	T/C	4.61707e-07	Zm00001d046661	Amino acid transporter-like protein
SRV	LN	AX-86276507	9	35049042	A/G	8.98958e-07	Zm00001d045720	Protein trichome birefringence-like 19
SRV	LN	AX-86291464	4	182586376	T/C	5.14665e-06	Zm00001d052184	Threonine endopeptidase
SRV	LN	AX-86309713	2	156931574	T/C	9.44157e-06	Zm00001d005063	Regulatory-associated protein of TOR 1
PRSA	LN	AX-86283262	10	142034207	A/G	2.78392e-05	Zm00001d026250	Xyloglucan endotransglucosylase/hydrolase protein 24
PRSA	LN	AX-86256287	10	76409327	A/C	6.54642e-05	Zm00001d024528	Choline-phosphate cytidylyltransferase 2
PRSA	LN	AX-86303648	10	34729857	A/C	7.96758e-05	Zm00001d023990	NADP-dependent oxidoreductase P2
PRV	LN	AX-86283262	10	142034207	A/G	2.14243e-05	Zm00001d026250	Xyloglucan endotransglucosylase/hydrolase protein 24
PRV	LN	AX-116875032	5	95633861	A/C	3.5376e-05	Zm00001d015520	Chaperone protein ClpB4 mitochondrial
PRV	LN	AX-86255639	10	10879427	A/C	3.72934e-05	Zm00001d023588	Probable receptor-like serine/threonine-protein kinase At5g57670
PRV	LN	AX-90559314	10	45547167	A/C	6.32034e-05
PRV	LN	AX-86266309	1	281590394	A/G	8.56839e-05	Zm00001d034032	Strictosidine synthase
PRV	LN	AX-86260390	1	99699061	A/G	8.94857e-05	Zm00001d030016	Disease resistance protein RPM1
PRV	LN	AX-90568890	3	171443739	T/C	9.15247e-05	Zm00001d042541	Lox1 – linoleate 9S-lipoxygenase1
PRV	LN	AX-86247335	4	187602445	A/G	9.20104e-05	Zm00001d052343	Probable serine/threonine-protein kinase WNK8
PRV	LN	AX-86253693	8	129502780	A/G	9.20104e-05	Zm00001d010837	Putative amino-acid acetyltransferase NAGS1 chloroplastic
PRV	LN	AX-86292865	5	123894610	T/C	9.20104e-05	Zm00001d015821	Exopolygalacturonase-like
PRV	LN	AX-90528258	1	50036334	T/C	9.20104e-05	Zm00001d028895	ATP-dependent Clp protease proteolytic subunit 5 chloroplastic
PRV	LN	AX-116875273	5	91265826	A/G	9.20104e-05	Zm00001d015456	Cyclin-dependent kinase B1-1
PRV	LN	AX-86264663	1	44230024	A/G	9.20104e-05	Zm00001d028720	Phosphatidylinositol transfer protein 2
TLRL	LN	AX-86273682	6	126347178	T/C	3.18086e-11	Zm00001d037468	Phosphate transporter PHO1-3
TLRL	LN	AX-86266372	1	298408800	A/G	1.21332e-08	Zm00001d034629	Indeterminate spikelet 1
TLRL	LN	AX-86250601	6	111675340	A/G	4.35354e-08	Zm00001d037079	Glutathione peroxidase
TLRL	LN	AX-86269378	3	187535554	T/C	4.35354e-08	Zm00001d043056	Serine/threonine-protein kinase NAK
TLRL	LN	AX-116873220	1	229068153	A/G	4.35354e-08	Zm00001d032517	Copper transport protein family
TLRL	LN	AX-86295573	7	130644017	T/C	7.72029e-08	Zm00001d020736	Gibberellin receptor GID1L2
TLRL	LN	AX-86306198	1	35946604	T/C	7.56068e-07	Zm00001d028470	Phosphatidylserine decarboxylase proenzyme 3
TLRL	LN	AX-86239884	1	77571945	A/C	2.40784e-06	Zm00001d029579	Transcriptional regulatory protein algP
TLRL	LN	AX-86256948	10	140353124	A/G	3.28157e-06	Zm00001d026169	Beta-expansin 2
TLRL	LN	AX-86273796	6	139918178	T/C	4.00149e-06	Zm00001d037859	Superoxide dismutase 3
TLRL	LN	AX-86251405	7	39644521	A/G	6.24827e-06	Zm00001d019519	Protein phosphatase 2C 29
TLRL	LN	AX-116872105	4	10394930	T/C	7.45494e-06	Zm00001d048946	GTP-binding protein hflX
TLRL	LN	AX-86278058	10	116680702	A/C	1.19111e-05	Zm00001d025383	G-type lectin S-receptor-like serine/threonine-protein kinase At2g19130
TLRL	LN	AX-86317884	7	28859205	A/C	1.19111e-05	Zm00001d019342	E3 ubiquitin-protein ligase ORTHRUS 2
TLRL	LN	AX-86321384	9	100740617	T/G	1.19111e-05	Zm00001d046656	Nudix hydrolase 2
TLRL	LN	AX-90548057	6	8680690	T/C	1.19111e-05	Zm00001d035191	Protein CHUP1, chloroplastic-like

## Sheet: Sheet2
Traits	Env		Total
	CK	LN
SPAD	7	2	9
PH	9	2	11
SDW	6	1	7
RDW	2	4	6
RSR	0	9	9
TRL	1	7	8
TRSA	1	2	3
TRV	2	1	3
CRN	14	1	15
CRL	3	6	9
CRSA	3	2	5
CRV	6	3	9
SRN	3	1	4
SRL	2	4	6
SRSA	4	3	7
SRV	1	4	5
PRL	10	0	10
PRSA	5	3	8
PRV	11	13	24
TLRL	11	16	27
