# Supplementary material for: Genome-Wide Association Studies of Maize Seedling Root Traits under Different Nitrogen Levels
Source: Plants (Basel). 2022 May 26;11(11):1417. doi: 10.3390/plants11111417 (PMC9182862; doi:10.3390/plants11111417)
Supplement: Supplementary file 1 [file plants-11-01417-s001.zip › Table S5.xlsx]

## Sheet: Sheet1
Table S5 – Primer sequence and qRT-PCR reaction system
Primer sequence	5`--3`
Zm00001d004123-F1	TTGACCAGACGATTGGGACG
Zm00001d004123-R1	CCAGCCCTTAATCCGAGTCC
Zm00001d025554-F1	CCATCAATGAGACAGCCATAGGA
Zm00001d025554-R1	CGTCAGTGAATAGGTCGGTTTAGA
Zm00001d050798-F1	CGAGATCCCGGAGTTGTTCG
Zm00001d050798-R1	TTCCGAAGCTCCACAACCTC
Zm00001d051083-F1	GTCTCTACGCCAATCCTCAGTC
Zm00001d051083-R1	CCACCGCCTCCATACTCTG
ZmActin -F1	CCATCACTGCCACACAGAAAAC
ZmActin -R1	AGGAACACGGAAGGACATACCAG
Reverse transcription system	10 ul
Reaction conditions	37℃ 15 min
	85℃ 5 sec
	4℃
Real-Time PCR System	SYBR Green Pro Taq HS Premix (ROX plus)	10 ul
	Template	2 ul (<100ng)
	Primer F (Diluted)	0.4 ul
	Primer R (Diluted)	0.4 ul
	Rnase free water	7.2 ul
Reaction conditions	Step 1 95℃ 30 sec
	Step 2 95℃ 5 sec / 60℃ 30 sec 40 cycles
	Step 3 Dissociation Stage
