# Supplementary material for: Genome-Wide Association Studies of Maize Seedling Root Traits under Different Nitrogen Levels
Source: Plants (Basel). 2022 May 26;11(11):1417. doi: 10.3390/plants11111417 (PMC9182862; doi:10.3390/plants11111417)
Supplement: Supplementary file 1 [file plants-11-01417-s001.zip › Table S6.xlsx]

## Sheet: Sheet1
Table S6 – 124 maize inbred lines used in this study
	Variety name	Variety code	serial number
1	238	3	2
2	501	5	4
3	7327	11	9
4	4F1	20	16
5	CF3	32	22
6	丹9046	36	26
7	JY01	52	32
8	K22	54	34
9	Liao138	57	37
10	旅28	62	42
11	Lx9801	63	43
12	LXN	64	44
13	LY042	65	45
14	M97	68	48
15	Nan21-3	71	51
16	Q1261	73	52
17	四273	81	60
18	TX5	86	64
19	TY2	88	66
20	TY3	89	67
21	TY4	90	68
22	TY7	92	70
23	ye478	95	73
24	ye4515	96	74
25	ye52106	97	75
26	自330	99	77
27	郑653	102	78
28	豫374	103	79
29	郑29	106	82
30	郑30	107	83
31	郑32	108	84
32	ZZ01	110	86
33	ZZ03	111	87
34	选46	112	88
35	莱1029	114	89
36	浚9058	116	91
37	太411	117	92
38	铁9010	119	93
39	S121	122	94
40	海9-21	126	96
41	G39改	128	97
42	郑58改	129	98
43	长612	131	99
44	原齐123	135	102
45	KH65	137	104
46	龙抗146	138	105
47	许178	140	106
48	K12	141	107
49	LXH01	142	108
50	旅系-2	143	109
51	PH09B	146	110
52	ZX531	147	111
53	深P	149	112
54	L215	150	113
55	S2	151	114
56	CA200	152	115
57	CA509	153	116
58	CA1108	154	117
59	利民33F	155	118
60	辽单565母	156	119
61	鄂玉16母	157	120
62	鄂玉16父	158	121
63	XY738F	159	122
64	振杰2母	160	123
65	三北2032母	161	124
66	金海5母	162	125
67	DMY3F	163	126
68	农单5母	164	127
69	京科968F	165	128
70	聊玉20母	166	129
71	聊玉20父	167	130
72	安玉8母	169	132
73	龙研31母	170	133
74	良玉88父	171	134
75	良玉88母	172	135
76	天塔5母	173	136
77	KWS3564F	174	137
78	KWS3562F	175	138
79	郑单22父	176	139
80	先玉128母	177	140
81	沈288	178	141
82	沈玉20父	179	142
83	沈玉20母	180	143
84	沈玉21母	181	144
85	登海11父	183	145
86	登海207父	185	147
87	正德5父	186	148
88	C61	187	149
89	C93	188	150
90	C116	189	151
91	C135	190	152
92	AMD1	191	153
93	AMD35	193	155
94	AMD50	194	156
95	AMD61	195	157
96	AMD86	196	158
97	CA1107	197	159
98	91227	X1	160
99	8147	X2	161
100	PX04	X3	162
101	HN008	X4	163
102	L110642	X8	165
103	HN110155	X6	166
104	2012KA-13	X7	167
105	2012YLA-3	X9	168
106	2013KA-58	X10	169
107	KA227	X12	170
108	AMD59*(PX+A)	X13	171
109	601*PH09B	X15	172
110	2013XCA1-1	X17	173
111	2014KA-60	X18	174
112	2082	X21	176
113	B53	X22	177
114	2012KB-7	X25	178
115	2012KB-20	X23	179
116	L123046*AMD43	X30	181
117	AMD43*DMYF	X32	182
118	Chang7*DMYF	X33	183
119	PX09*Z120027	X31	184
120	2013HXB1-4	X35	185
121	2013ZZB1-6	X34	186
122	2013HZB1-9	X37	187
123	K12TC	X39	189
124	Chang7-2	X40	190
