# Supplementary figures and images for: Genome-Wide Association Studies of Maize Seedling Root Traits under Different Nitrogen Levels
Source: MDPI journal article supplement (doi:10.3390/plants11111417), 2022-05-26

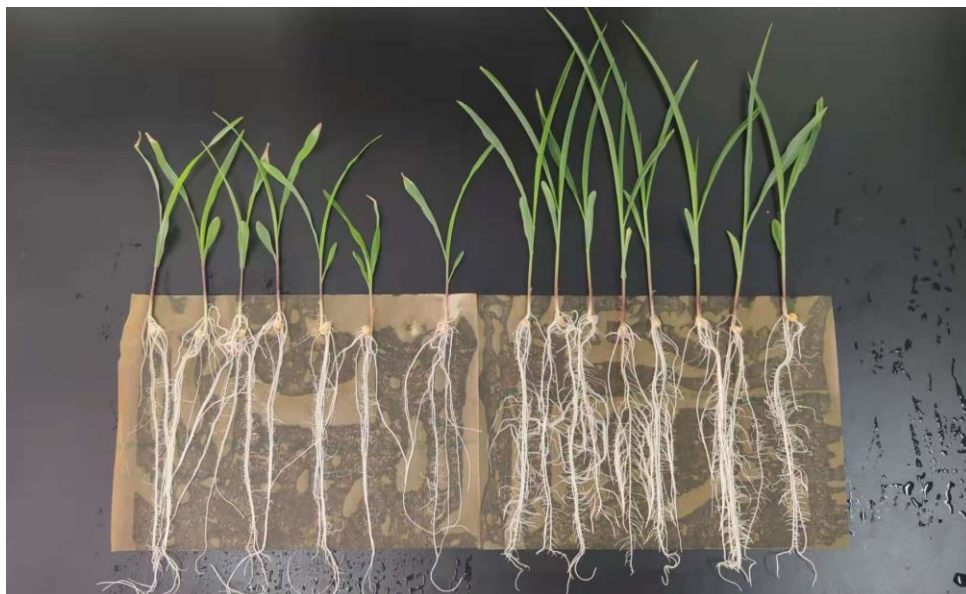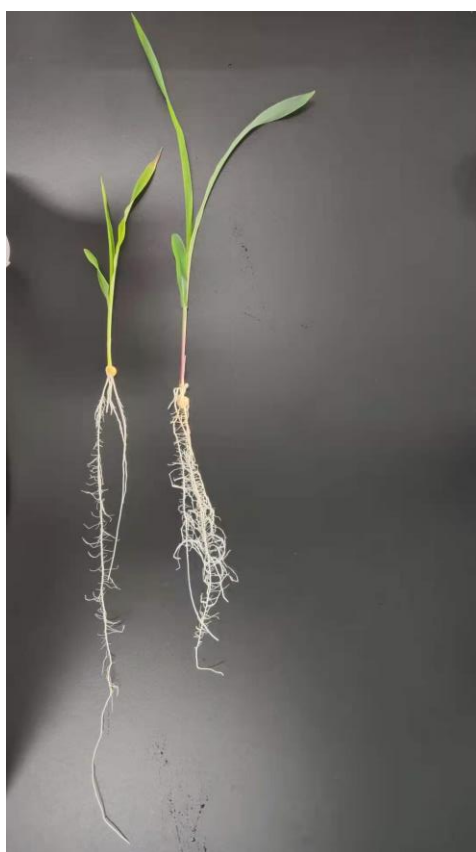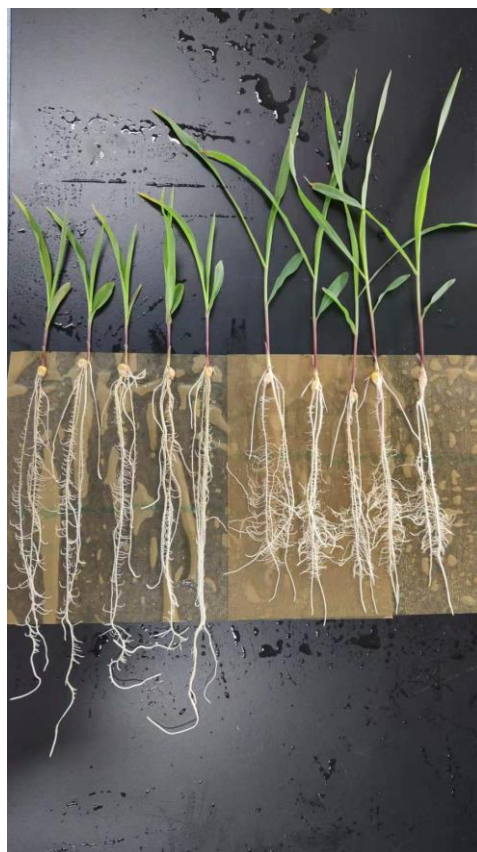

**Figure S7 Phenotypic Results Plot**

Supplement: s1 [file s1]
